# Supplementary material for: Cell Adhesion-Related Molecules Play a Key Role in Renal Cancer Progression by Multinetwork Analysis
Source: Hindawi journal article supplement (doi:10.1155/2019/2325765), 2019-12-17

**Supplementary Table****Table S1. Clinical characteristics of RCC patients**

| <b>Variables</b>              | <b>RCC patients (n=160)</b> |
|-------------------------------|-----------------------------|
| <b>Gender (%)</b>             |                             |
| Male                          | 108 (67.5)                  |
| Female                        | 52 (32.5)                   |
| <b>Age (%)</b>                |                             |
| ≤60                           | 94 (58.8)                   |
| >60                           | 66 (41.2)                   |
| <b>Tumor size (%)</b>         |                             |
| ≤4cm                          | 85 (53.1)                   |
| >4cm                          | 75(46.9)                    |
| <b>Fuhrman grade (%)</b>      |                             |
| I / II                        | 123 (76.9)                  |
| III/VI                        | 37 (23.1)                   |
| <b>TNM stage (%)</b>          |                             |
| I / II                        | 126 (78.8)                  |
| III/VI                        | 44 (21.2)                   |
| <b>Tumor thrombus (%)</b>     |                             |
| No                            | 148 (92.5)                  |
| Yes                           | 12 (7.5)                    |
| <b>Distant metastasis (%)</b> |                             |
| No                            | 144 (90.0)                  |
| Yes                           | 16(10.0)                    |

**Table S2. Sequences of primers used for qRT-PCR in this study**

|               |                        |
|---------------|------------------------|
| CD44 Forward  | GGATCACCGACAGCACAGAC   |
| CD44 Reverse  | TTCTTGCCTCTTGGTTGCTG   |
| CD86 Forward  | TAGGTCACAGCAGAAGCAGC   |
| CD86 Reverse  | AATCAAAACTTGTGCGGCC    |
| EGFR Forward  | TGGTCAAGTGCTGGATGATAGA |
| EGFR Reverse  | ACGGTAGAAGTTGGAGTCTGTA |
| EGF Forward   | ACGCAGTTCCCACCCATTT    |
| EGF Reverse   | AACTCTGACTCTGAATGC     |
| VEGFA Forward | AGGCCAGCACATAGGAGAGA   |
| VEGFA Reverse | CTGGTTCCCGAAACCCTGAG   |
| FN1 Forward   | GACACATTCCACAAGCGTCA   |
| FN1 Reverse   | CTCCAATTTGATAAAACGTCCC |
| TLR2 Forward  | CTCCCAGTGTTTGGTGTTC    |
| TLR2 Reverse  | GGCTTGAACCAGGAAGACGA   |
| ITGAM Forward | TCAGCCCCTCCCATAGCCA    |
| ITGAM Reverse | GCTCCTACAGTCAGGTCTACCA |
| ITGB2 Forward | CCAGGGCAGACTGGTAGCAA   |
| ITGB2 Reverse | AGAGGACTGAGGGACGAGGC   |

## Supplementary Figure

Figure S1. Gene ontology (a-c) and KEGG pathway (d) analysis of the down-regulated differentially expressed genes associated with renal cancer. The threshold was a fold change  $\geq 2.0$  and a p-value  $< 0.05$ . BP: biological process; MF: molecular function; CC: cellular component.

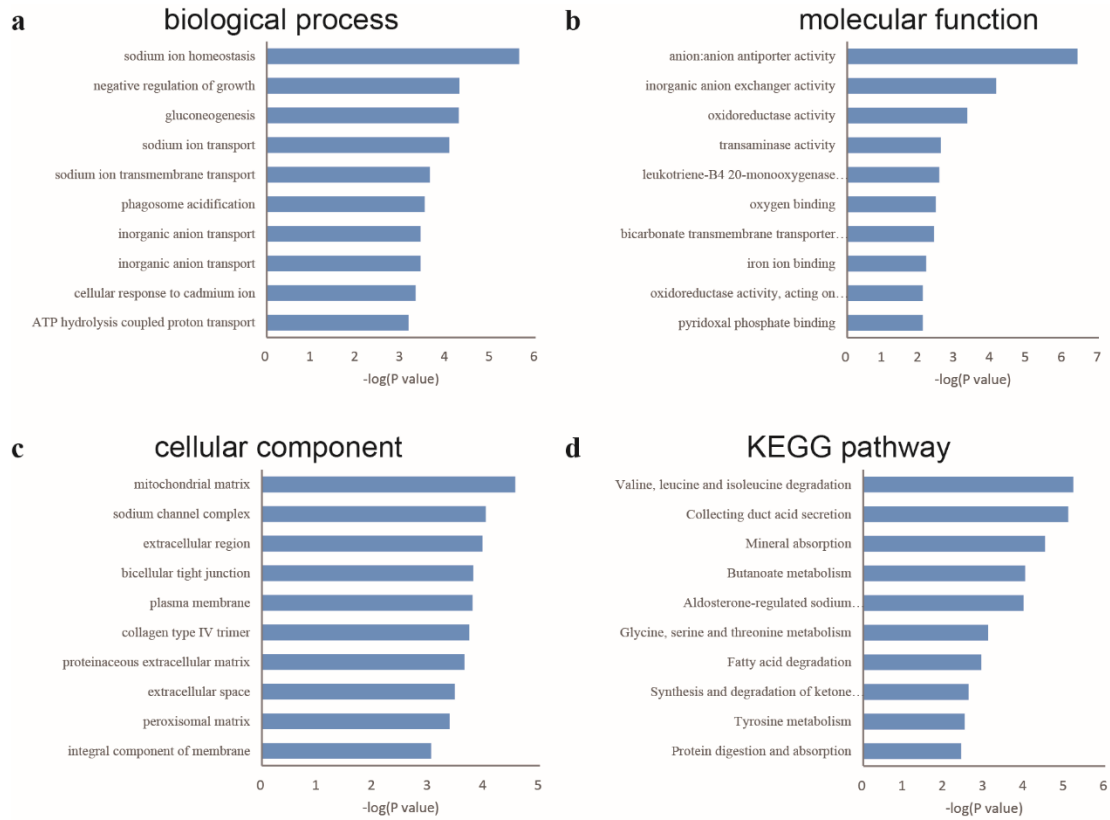

Figure S2. (a) The ITGB2 mRNA expression between RCC samples and paired normal tissues was compared using qRT-PCR analysis (n = 40). (b) The survival analyses of hub genes, including EGF, VEGFA, TLR2, PTPRC, ITGAM and ITGB2.  $p < 0.05$  was considered statistically significant.

**a**

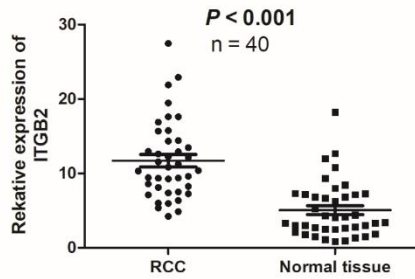

**b**

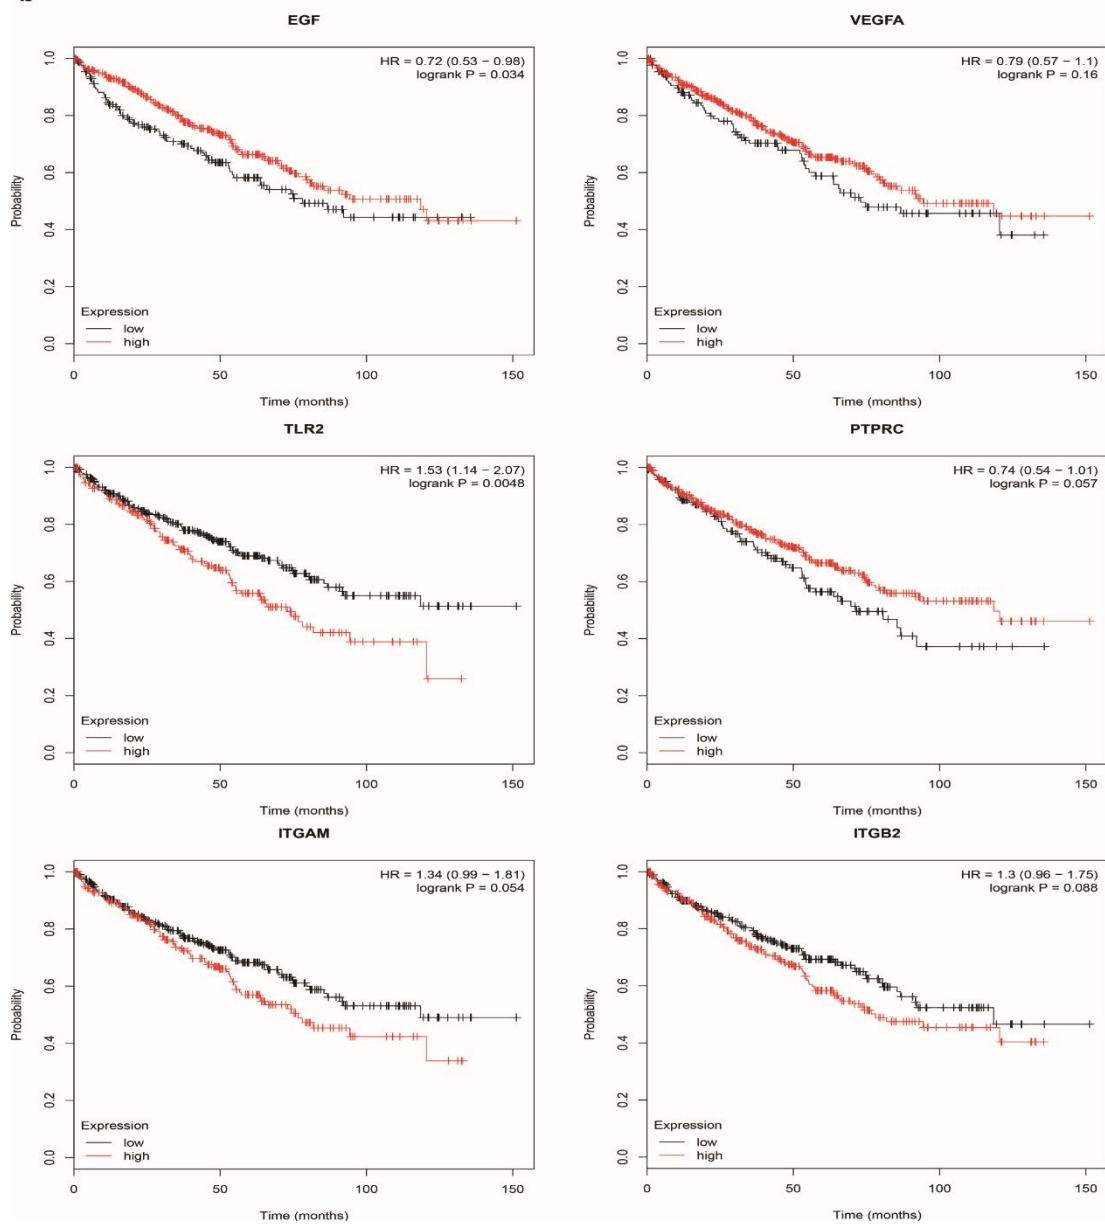

Supplement: f1 [file 2325765.f1.pdf]
